# Supplementary material for: Secret lifestyles of Neurospora crassa
Source: PubMed Central journal article supplement (PMC4038807; doi:10.1038/srep05135), 2014-05-30
Supplement: srep05135-s1.pdf [file srep05135-s1.pdf]

**Supplementary information**

**Secret lifestyles of *Neurospora crassa***

**Hsiao-Che Kuo, Sun Hui, Jaeyoung Choi, Frederick O. Asiegbu, Jari P. T. Valkonen,**

**Yong-Hwan Lee**

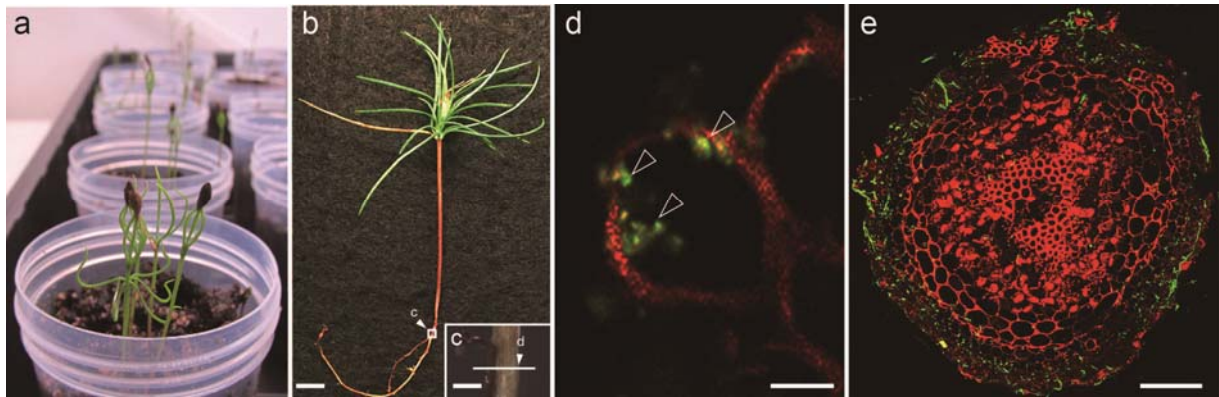

**Supplementary Figure S1. Endophytic lifestyle of *N. crassa* in Scots pine.** (a) Scots pine seedlings grown in microcosm for 2 weeks before inoculation. (b) Scots pine seedling 5 months post inoculation (mpi) by *N. crassa* FGSC 10589 in microcosm. (c) Area of sampling for microscopic observation. (d) *N. crassa* hyphae expressing GFP (arrows) in the root of Scots pine seedling at 5 mpi. (e), Transverse section of Scots pine root inoculated by *N. crassa* FGSC 2489 on water agar. Seedling survived healthy without any symptom until 3 mpi. Plant cell walls were stained with PI, and fungal hyphae were labeled with WGA. Bars = 1 cm (b); 1 mm (c); 5  $\mu$ m (d); 100  $\mu$ m (e).

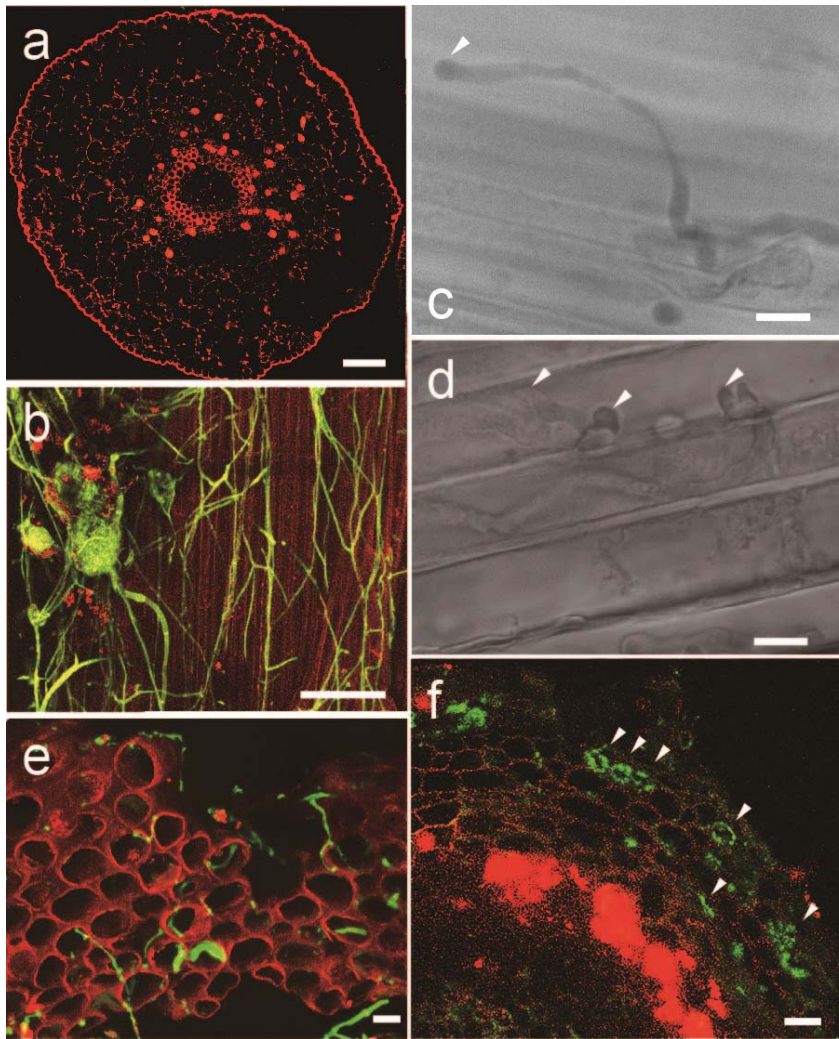

**Supplementary Figure S2. Association of *N. crassa* with Scots pine.** (a) Transverse section of 3-week-old uninfected seedling stained with PI. (b) *N. crassa* hyphae (stained with WGA) grown on the root surface at 3 wpi. (c) A hyphopodia-like structure (white arrowhead) on the root surface. Fungal hyphae were stained with trypan blue. (d) *N. crassa* hyphae (white arrowheads) penetrate and grow within plant tissue (stem). (e) Three dimensional (3D) confocal image of Scots pine's root tissue at 3 wpi with *N. crassa*. (f) Invasive growth of *N. crassa* FGSC 10589 from one cell to an adjacent cell at 3 wpi (GFP of fungal hyphae are indicated by white

arrowheads). Bars = 100  $\mu\text{m}$  (**a**, **b**, and **f**); 10  $\mu\text{m}$  (**c**, **d**, and **e**). *N. crassa* strain used in a, b, c, d, and e was FGSC 2489.

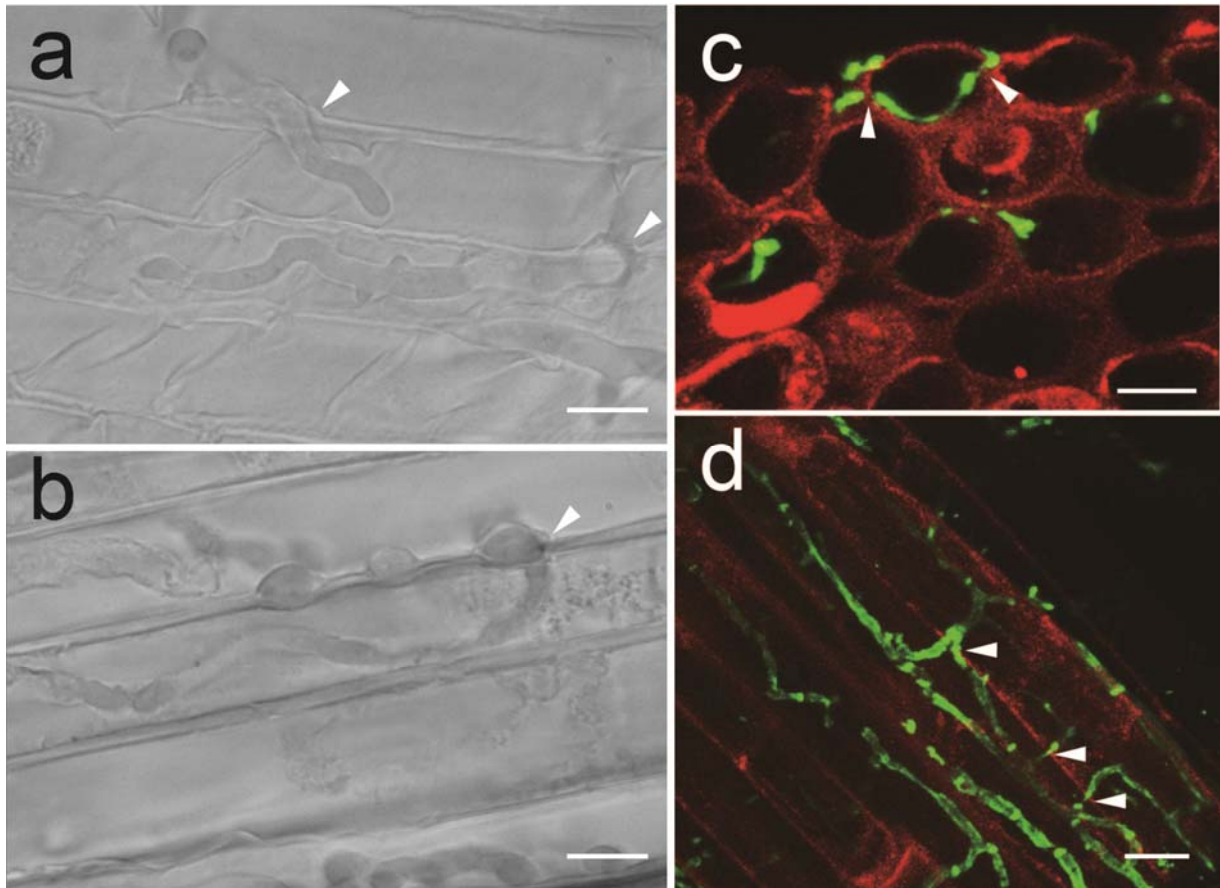

**Supplementary Figure S3. Intercellular growth of *N. crassa* in Scots pine cells.** (a and b) *N. crassa* hyphae penetrate and grow within plant tissue (stem). (c) Three dimensional (3D) confocal image of Scots pine's root tissue at 3 wpi with *N. crassa*. (d) Image of *N. crassa* hyphae stained with WGA within host plant cells. White arrowheads indicate the places where *N. crassa* hyphae penetrate through cell wall. Bars = 10  $\mu\text{m}$ . *N. crassa* strain used in a, b, c, d was strain FGSC 2489.

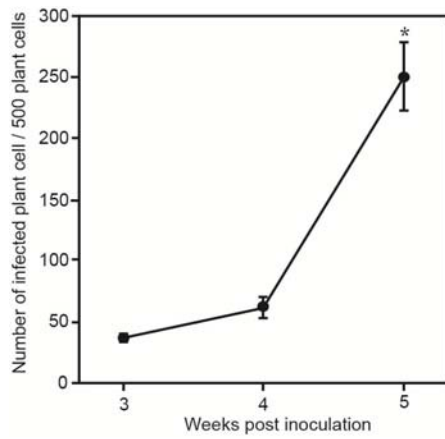

**Supplementary Figure S4. Infection progress of *N. crassa* in Scots pine's roots.** The number of infected cells by *N. crassa* was counted in Scots pine's roots from 3 to 5 wpi. There were 3 biological replicates (500 cells from 10 trees each) at each time point. The bars indicate standard deviation among biological replicates. The number of infected cells was significantly increased in 5 wpi compared to 3 and 4 wpi. \*,  $p < 0.01$ .

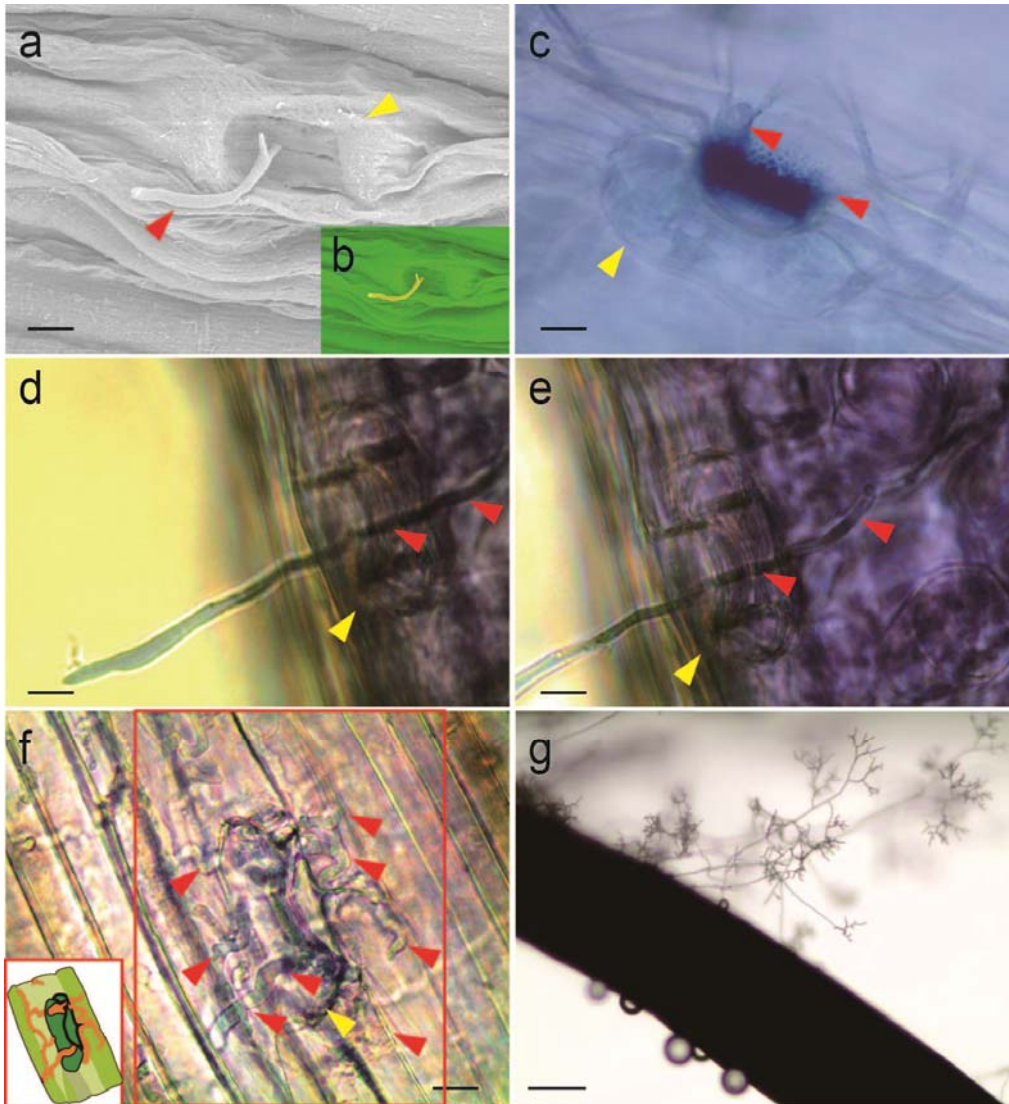

**Supplementary Figure S5. Asexual reproduction of *N. crassa* on a living Scots pine.** (a-f) *N. crassa* hyphae growing out from stomata of the stems of Scots pine seedlings at 3 wpi. (c) sample stained with trypan blue. (d) hyphal tip. (e) hyphae inside host plant. (g) *N. crassa* growing out from an infected pine seedling formed conidiophores with conidia (asexual spores) on needles. Bars = 10  $\mu\text{m}$  (a-f); 500  $\mu\text{m}$  (g). Yellow and red arrowheads indicate stomata and *N. crassa* hyphae, respectively.

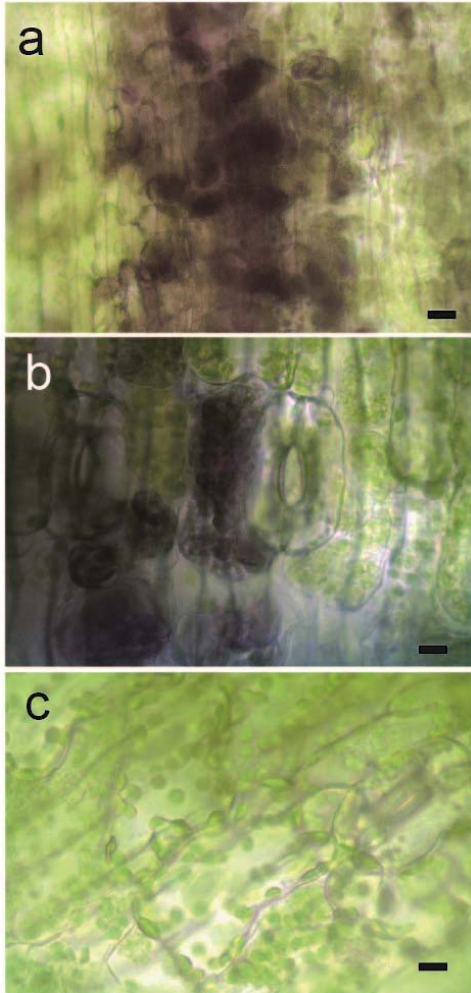

**Supplementary Figure S6. Host cell death by infection and culture filtrate of *N. crassa*.** (a) Cell death caused by inoculation of *N. crassa*. (b) Cell death caused by culture filtrate of *N. crassa*. (c) Control treated by culture medium. Dead plant cells were visualized by staining with Evan blue.



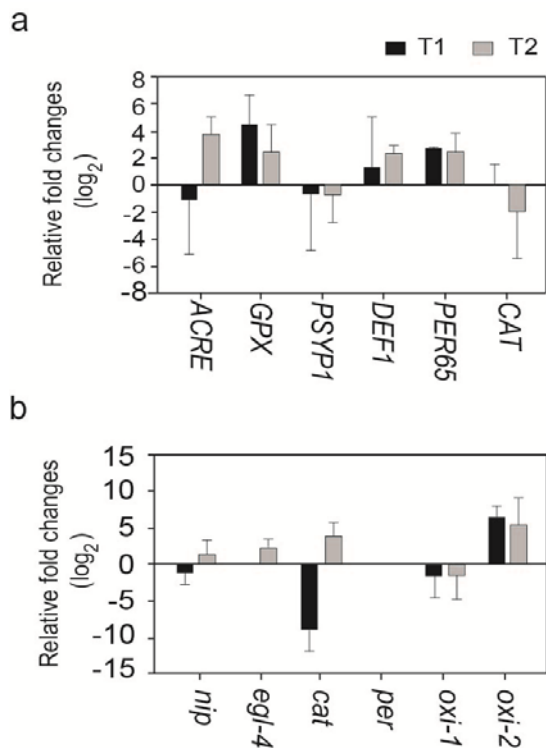

**Supplementary Figure S7. Gene expression patterns during interactions between Scots pine and *N. crassa*.** (a) Expression patterns of defense-related genes in Scots pine's stem after *N. crassa* infection were measured at one (T1) and two (T2) weeks after inoculation. *ACRE*, Avr9/Cf-9 rapidly elicited defense-related gene; *DEF1*, defensin; *PER65*, peroxidase 65; *PSYP1*, Class III peroxidase; *GPX*, glutathione peroxidase; and *CAT*, catalase. (b) Expression patterns of *N. crassa* genes were measured at one (T1) and two (T2) weeks after inoculation. *nip*, necrosis-inducing protein; *cat*, catalase-1; *per*, dyp-type peroxidase; and *oxi-1* and *oxi-2*, two oxidoreductases. RNAs from uninfected trees and *N. crassa* grown in culture medium were used as controls for defense-related and fungal genes, respectively.  $\alpha$ -tubulin (*TUBA*) and 40S ribosome genes were used as reference genes to normalize the data for the host plant and the fungus, respectively. There were 3 biological replicates for each experiment. The bars indicate standard deviation among biological replicates.

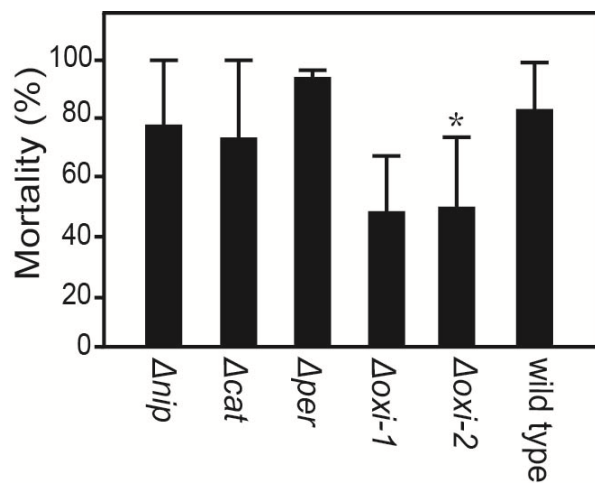

**Supplementary Figure S8. Mortality of Scots pine seedlings by wild-type (FGSC 2489) and mutant strains of *N. crassa*.** Inoculated plants were incubated in a growth chamber and mortality was recorded 5 wpi.  $\Delta nip$ , FGSC 13784;  $\Delta cat$ , FGSC 11258;  $\Delta per$ , FGSC 14417;  $\Delta oxi-1$ , FGSC 19367; and  $\Delta oxi-2$ , FGSC 12090. \*,  $p < 0.05$ . There were 3 biological replicates (9 trees each). The bars indicate standard deviation among independent experiments.

Supplementary Table S1. Forest soil samples used in this study

| Location and soil type                          | Collection date    | Number of samples |
|-------------------------------------------------|--------------------|-------------------|
| Indonesia; Mineral soil                         | June 2010          | 3                 |
| Finland; Mineral soil;<br>Post-forest fire site | August 2011        | 52                |
| Finland; Peatland                               | June 2010          | 15                |
| Finland; Peatland                               | June 2010          | 15                |
| Finland; Mineral soil                           | June 2010          | 9                 |
| Finland; Mineral soil                           | March-October 2012 | 21                |

Supplementary Table S2. Fungal strains used in this study

| FGSC#* | Strain information                                        | NCU#† |
|--------|-----------------------------------------------------------|-------|
| 2489   | <i>Neurospora crassa</i> 74-OR23-1A                       |       |
| 10589  | <i>Neurospora crassa</i> Pccg-1::sGFP::bar+(EC)           |       |
| 13784  | <i>Neurospora crassa</i> necrosis inducing protein mutant | 02338 |
| 11258  | <i>Neurospora crassa</i> catalase-1 mutant                | 08791 |
| 14417  | <i>Neurospora crassa</i> dyp-type peroxidase mutant       | 09210 |
| 19367  | <i>Neurospora crassa</i> oxidoreductase mutant            | 00520 |
| 12090  | <i>Neurospora crassa</i> oxidoreductase mutant            | 06061 |
|        | <i>Heterobasidion annosum</i>                             |       |

\*FGSC, Fungal Genetics Stock Center

†NCU, Locus number of annotated gene

Supplementary Table S3. qRT-PCR primers for *P. sylvestris* genes

| Target gene                                                     | Name of primer | Sequence               | Genbank acc./EMBL acc. |
|-----------------------------------------------------------------|----------------|------------------------|------------------------|
| defensin ( <i>DEF1</i> )                                        | PS-Def1-RT-F   | CGTGCTGCTTGTTATAACCA   | EF455616               |
|                                                                 | PS-Def1-RT-R   | CAACTTCCCGTTGGAAATCC   |                        |
| peroxidase 65 ( <i>PER65</i> )                                  | PS-PER65-RT-F  | GCCCAGAATTTATTGTTGGA   | EL342386               |
|                                                                 | PS-PER65-RT-R  | CTGTAAATATAAGCTCCCTGGT |                        |
| Avr9/Cf-9 rapidly elicited defense-related gene ( <i>ACRE</i> ) | PS-DR-RT-F     | GTAAAGTCTATGGAAGAAGCCT | AY423270               |
|                                                                 | PS-DR-RT-R     | TGAATGCATGGAAAGTGCAG   |                        |
| class III peroxidase PSYP1 ( <i>PSYP1</i> )                     | PS-PSYP1-RT-F  | GTGATTGTATATGGTAGCGCTG | AF291667               |
|                                                                 | PS-PSYP1-RT-R  | GTCTGCACTCAAATAGACTTCC |                        |
| glutathione peroxidase ( <i>GPX</i> )                           | PS-GPx-RT-F    | ATGCCAATTTAGCACCAAGG   | FN546175               |
|                                                                 | PS-GPx-RT-R    | GCTTTCCCATGCAATCAGTT   |                        |
| catalase ( <i>CAT</i> )                                         | PS-CAT-RT-F    | AAGGGCTTTTTTCGAGGTGAC  | FN546173               |
|                                                                 | PS-CAT-RT-R    | GGAATTACCTGCATGGCATC   |                        |
| $\alpha$ -tubulin ( <i>TUBA</i> )                               | PS-Tub-RT-F    | GATCTGGTTCAGCCTGATGG   | FN546172               |
|                                                                 | PS-Tub-RT-R    | CCAGTCCGTACCTCGTCAAT   |                        |

Supplementary Table S4. qRT-PCR primers for *Neurospora crassa* genes

| Target gene                              | Name of primer | Sequence                   | NCU#  |
|------------------------------------------|----------------|----------------------------|-------|
| necrosis inducing protein ( <i>nip</i> ) | 02338F         | CTCTCGACTTTGACACCGAC       | 02338 |
|                                          | 02338R         | AGAGATAAATGCACCAGCCG       |       |
| endoglucanase IV ( <i>egl-4</i> )        | 07760F         | CATCGACCAGAAGGACAACG       | 07760 |
|                                          | 07760R         | GTCGATCTTGAAGAACTTGAGGG    |       |
| catalase-1 ( <i>cat</i> )                | 08791F         | CAGAACCACCCACAGAACAC       | 08791 |
|                                          | 08791R         | GAAGCGCATGATCCTTTCAC       |       |
| dyp-type peroxidase ( <i>per</i> )       | 09210F         | CTGTTTCGGTACAGCAATGAC      | 09210 |
|                                          | 09210R         | CGAAGATCAATCCTGACTTGAC     |       |
| oxidoreductase ( <i>oxi-1</i> )          | 00520F         | CTGAAGAAATCGAAGAACAACCTCTC | 00520 |
|                                          | 00520R         | GTGGATCTTGTAGATGTCGGTC     |       |
| oxidoreductase ( <i>oxi-2</i> )          | 06061F         | TGGCTTCTACCATCTCATTGG      | 06061 |
|                                          | 06061R         | CTCAAAGAGAAACTGCTTCCTG     |       |
| 40S ribosome                             | NrDNAF         | TCACATGCAGCCTTACCTC        | 03393 |
|                                          | NrDNAR         | GACGATCTTCTCCCAGGTC        |       |
